# Supplementary material for: The Adiponectin Receptor Agonist, ALY688: A Promising Therapeutic for Fibrosis in the Dystrophic Muscle
Source: MDPI journal article supplement (doi:10.3390/cells12162101), 2023-08-19
Supplement: s1 [file s1]

**Table S1. Antibody Information Chart for Immunohistochemistry and Immunofluorescence**

| Antibody                       | Species raised    | Dilution | Incubation time | T°  | Product code | Source                                               |
|--------------------------------|-------------------|----------|-----------------|-----|--------------|------------------------------------------------------|
| <b>Immunohistochemistry</b>    |                   |          |                 |     |              |                                                      |
| IL-1 $\beta$                   | rabbit polyclonal | 1/200    | 2h30            | RT  | ab2105       | Abcam, Cambridge, UK                                 |
| TNF $\alpha$                   | rabbit polyclonal | 1/100    | 2h30            | RT  | ab6671       | Abcam, Cambridge, UK                                 |
| HNE                            | rabbit polyclonal | 1/200    | Overnight       | 4°C | ab46545      | Abcam, Cambridge, UK                                 |
| PRDX3                          | rabbit polyclonal | 1/1000   | Overnight       | 4°C | /            | Gift from Bernard Knoops, UCL, Belgium <sup>21</sup> |
| CD68                           | rabbit polyclonal | 1/500    | 2h30            | RT  | ab125212     | Abcam, Cambridge, UK                                 |
| <b>Immunofluorescence</b>      |                   |          |                 |     |              |                                                      |
| Dystrophin                     | rabbit polyclonal | 1/200    | Overnight       | 4°C | ab15277      | Abcam, Cambridge, UK                                 |
| Laminin-2 ( $\alpha$ -2 chain) | rat monoclonal    | 1/1000   | Overnight       | 4°C | L0663        | Sigma Aldrich, Missouri, USA                         |

**Table S2. Sequences of real-time PCR primers**

| Gene               | Forward primer (5'-3')    | Reverse primer (5'-3')   | Melting T° |
|--------------------|---------------------------|--------------------------|------------|
| <b>Mouse</b>       |                           |                          |            |
| <i>COL1A1</i>      | CCGATGGATTCCCGTTCGAGT     | GGTGGACATTAGGCGCAGGA     | 62°C       |
| <i>COL3A1</i>      | AAGAGGATCTGAGGGCTCGC      | AGGGTGAAAAGCCACCAGACT    | 62°C       |
| <i>Cyclophilin</i> | AACCCACCGTGTTCTTC         | TGCCTTCTTTCACCTTCCC      | 62°C       |
| <i>Cyclophilin</i> | TGCAAACAGCTCGAAGGAGACGC   | ACGCCACTGTCGCTTTTCGCC    | 67°C       |
| <i>ERRα</i>        | GCCTCTGGCTACCACTACGG      | CAGACGCACACCCTCCTTGA     | 62°C       |
| <i>Mrf4</i>        | TGCGGATTCCTGCGCACCT       | GCATCCACGTTTGCTCCTCCTTCC | 67°C       |
| <i>Myh1</i>        | AGCTTCAAGTTTGGACCCACGGTCG | GCAGCCTCCCCGAAAACGGC     | 67°C       |
| <i>Myh7</i>        | GGTGCCAAGGGCCTGAATGAGGAG  | GGTCTGAGGGCTTCACGGGCAC   | 67°C       |
| <b>Human</b>       |                           |                          |            |
| <i>AdipoR1</i>     | ACTCCTAAGCACCGGCAGAC      | CAAGCCAAGTCCCAGGAACA     | 62°C       |
| <i>IL-1β</i>       | GAATCTCCGACCACCACTACA     | TGCACATAAGCCTCGTTATCCC   | 62°C       |
| <i>TBP</i>         | CCCCATGACTCCCATGACCC      | ACGAAGTGCAATGGTCTTTAGGT  | 62°C       |
| <i>TNFα</i>        | CTCTTCTGCCTGCTGCACTTT     | GATGATCTGACTGCCTGGGC     | 62°C       |
| <i>UTRN</i>        | ATTGTAAGGCCCTGAGACGGG     | TTCAGGGGCCTCAATTGGCT     | 62°C       |

*Cyclophilin* and *TBP* were used as reference gene in mice/C2C12 and humans, respectively.

**Table S3. ELISA kit references**

| Antibody       | ELISA kit number | Source                    | Previous work using the cited kit in muscle |
|----------------|------------------|---------------------------|---------------------------------------------|
| HNE            | ab238538         | Abcam                     | Abou Samra et al, JCSM, 2020                |
| Myh7B          | ABIN6968750      | Antibodies-online         | No citation available                       |
| Myogenin       | ABIN6957954      | Antibodies-online         | No citation available                       |
| P-AMPK         | #7959            | Cell Signaling Technology | Abou Samra et al, JCSM, 2020                |
| PGC-1 $\alpha$ | MBS707053        | MyBioSource               | Selvais et al, JCSM, 2023                   |
| P-p65          | #7173            | Cell Signaling Technology | Abou Samra et al, JCSM, 2020                |
| P-RIP          | #88918           | Cell Signaling Technology | No citation available                       |
| P-SMAD2        | #7348            | Cell Signaling Technology | Dubuisson et al, Front Immunol, 2022        |
| TGF- $\beta$   | MBS824944        | MyBioSource               | Narola et al, PLoS One, 2013                |
| TNF $\alpha$   | MBS2884132       | MyBioSource               | Abou Samra et al, JCSM, 2020                |
| UTRN           | ABIN6960407      | Antibodies-online         | Abou Samra et al, JCSM, 2020                |

**Table S4. Skeletal muscle weight at the end of the study.** *Effects of ALY688 treatment on muscle weight.* The total (mg) and relative (corrected by body weight (mg/gBW)) weight of TA, G and Q from the four groups of mice were compared at the age of 12 weeks (sacrifice). Data are means  $\pm$  SEM;  $n = 8-10$  mice per group. Statistical analysis was performed using one-way ANOVA followed by Tukey's test.

\*\*\* $P < 0.001$  vs WT.

| Muscle                        | Weight                   | WT<br>(mean $\pm$ SEM) | mdx<br>(mean $\pm$ SEM) | mdx-T3<br>(mean $\pm$ SEM) | mdx-T15<br>(mean $\pm$ SEM) |
|-------------------------------|--------------------------|------------------------|-------------------------|----------------------------|-----------------------------|
| <i>Tibialis anterior</i> (TA) | Weight (mg)              | 83.6 $\pm$ 1.5         | 147.8 $\pm$ 3.1***      | 153.5 $\pm$ 4.0***         | 145.7 $\pm$ 4.1***          |
|                               | Relative weight (mg/gBW) | 2.9 $\pm$ 0.1          | 4.4 $\pm$ 0.1***        | 4.5 $\pm$ 0.1***           | 4.4 $\pm$ 0.1***            |
| <i>Gastrocnemius</i> (G)      | Weight (mg)              | 313.6 $\pm$ 2.8        | 378.5 $\pm$ 7.2***      | 388.9 $\pm$ 9.1***         | 386.6 $\pm$ 8.1***          |
|                               | Relative weight (mg/gBW) | 10.8 $\pm$ 0.2         | 11.4 $\pm$ 0.1          | 11.4 $\pm$ 0.2             | 11.6 $\pm$ 0.2              |
| <i>Quadriceps</i> (Q)         | Weight (mg)              | 376.2 $\pm$ 5.9        | 568.9 $\pm$ 18.3***     | 569.6 $\pm$ 16.2***        | 563.6 $\pm$ 15.2***         |
|                               | Relative weight (mg/gBW) | 13.0 $\pm$ 0.3         | 17.1 $\pm$ 0.4***       | 16.7 $\pm$ 0.4***          | 16.9 $\pm$ 0.4***           |

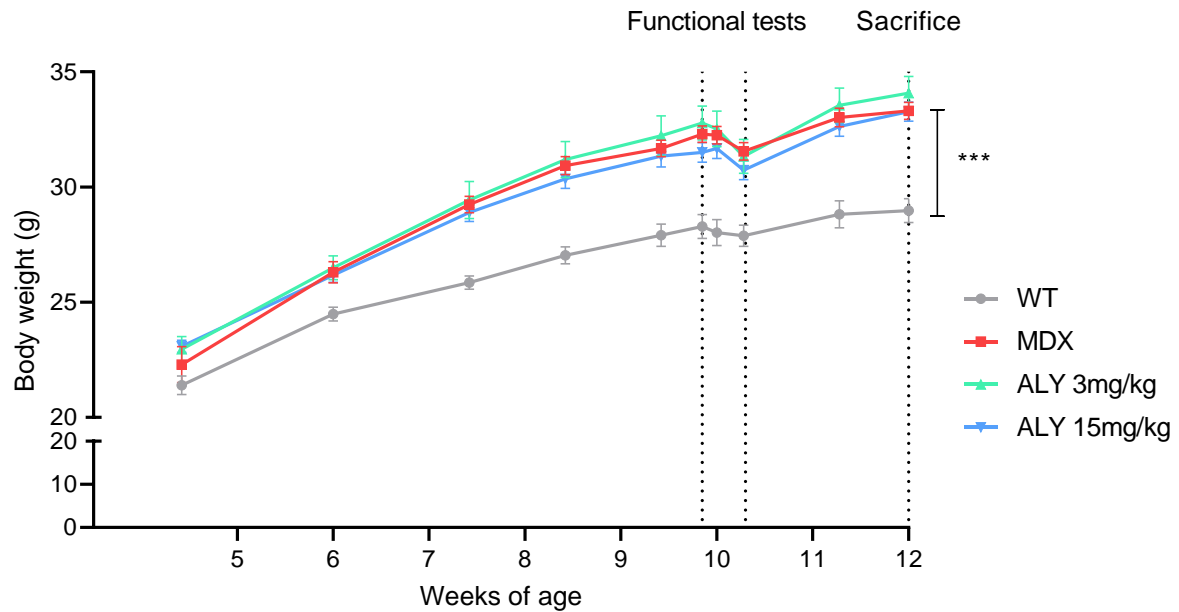

**Figure S1.** *Effects of ALY688 treatment on body weight.* The body weight of the four groups of mice were compared throughout the study period (from the age of 4 weeks to the age of 12 weeks): WT, mdx (untreated), mdx treated with ALY688 3 mg/kg (mdx-T3) and mdx treated with ALY688 15 mg/kg (mdx-T15) mice. Data are means  $\pm$  SEM;  $n = 8-10$  mice per group. Statistical analysis was performed using one-way ANOVA followed by Tukey's test. \*\*\* $P < 0.001$  vs WT. As already described (Coley et al. Hum. Mol. Gen., 2016), mdx mice were bigger than WT ones and their skeletal muscles were heavier, reflecting the well-documented muscle hypertrophy of this model. Most importantly, all the mice displayed harmonious weight growth during the study and no difference was observed between untreated and treated mdx mice, thereby confirming the absence of deleterious effect caused by ALY688

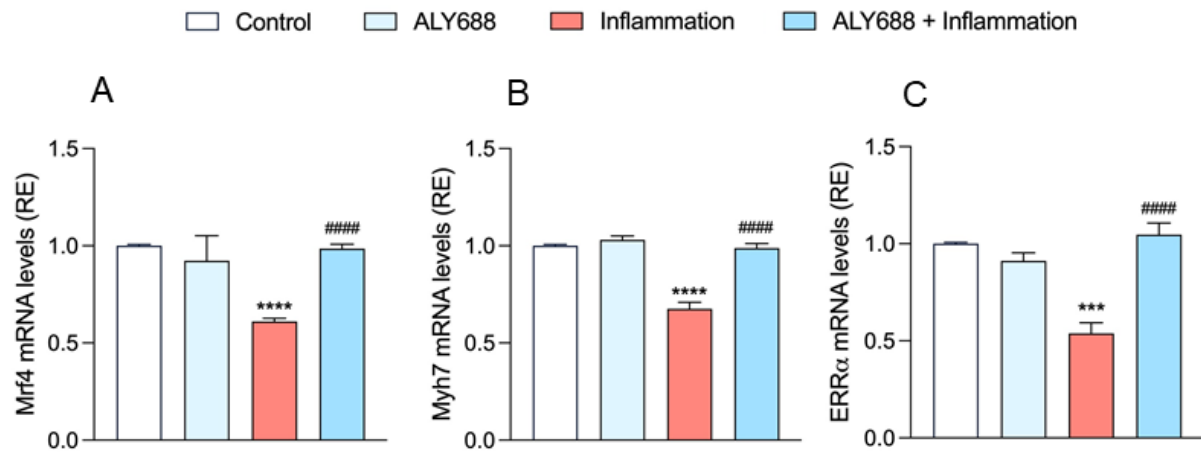

**Figure S2.** Effects of ALY688 treatment on muscle markers of differentiation and fibre phenotype in C2C12. Experiments were performed on murine C2C12 myotubes. Cells were treated or not with ALY688 (100 nM) for 24 h, while being challenged or not with an inflammatory cocktail [TNF $\alpha$  (10 ng/mL) and IFN $\gamma$  (10 ng/ml)]. (A-C) mRNA levels of markers of muscle differentiation (*Mrf4*), oxidative (*Myh7*) fibres as well as of mitochondrial biogenesis (*ERR $\alpha$* ) were quantified. These levels were normalised to *Cyclophilin*. Results were then presented as relative expression compared to control condition (i.e no inflammation, no ALY688). Data are means  $\pm$  SEM;  $n = 4$  independent cultures for all experiments. Statistical analysis was performed using one-way ANOVA followed by Tukey's test. \*\*\* $P < 0.001$ , \*\*\*\* $P < 0.0001$  vs controls. #### $P < 0.0001$  vs inflammatory condition.

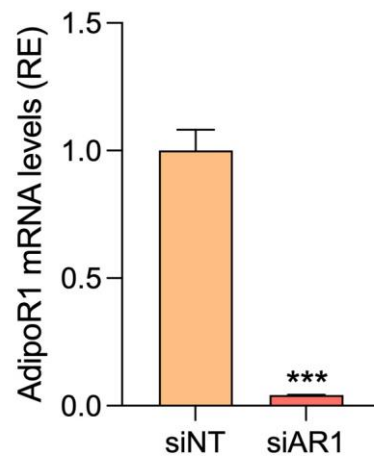

**Figure S3.** *Effectiveness of siRNA against AdipoR1.* Human myotubes were transfected with siRNA against *AdipoR1* (50 nM) or a negative control [non-targeting, siNT (50 nM)] for 24h. *AdipoR1* mRNA levels were normalised to human *TBP*. The subsequent ratios are presented as relative expression (RE) compared with siNT conditions. Data are means  $\pm$  SEM for 4 cultures, each obtained from a different donor (i.e., 4 DMD subjects). Statistical analysis was performed using two-tailed paired Student's t-test. \*\*\* $P < 0.001$  for indicated conditions.

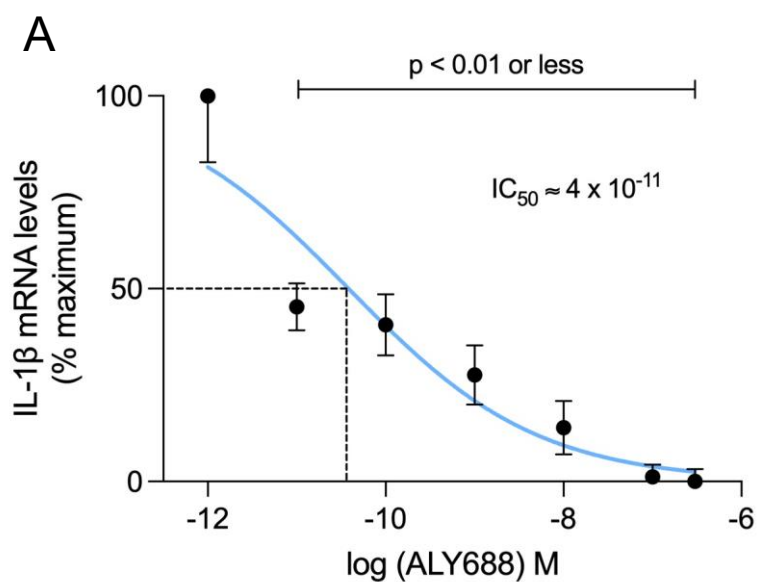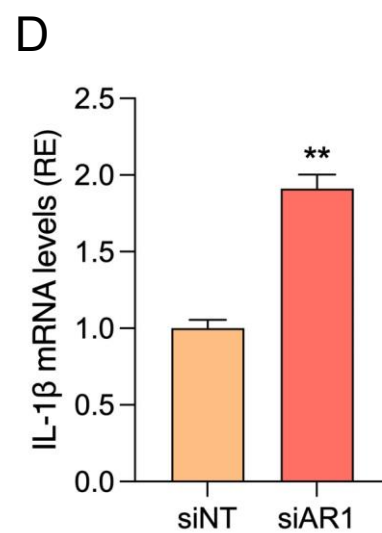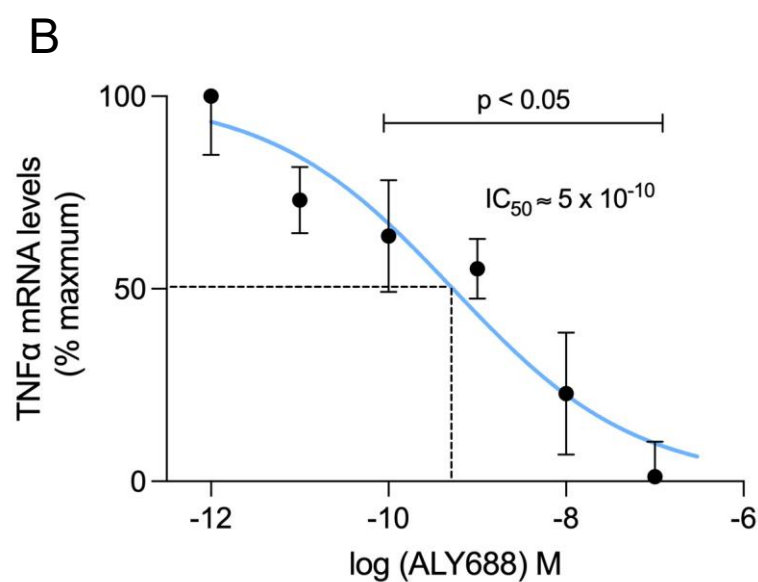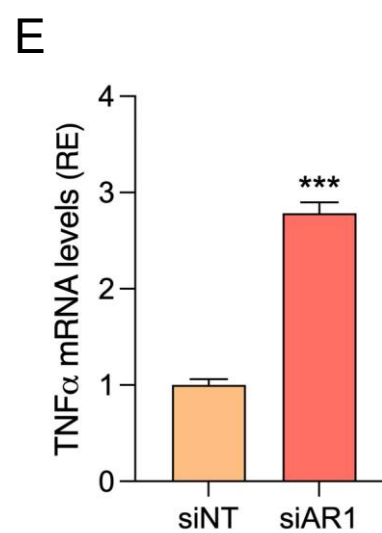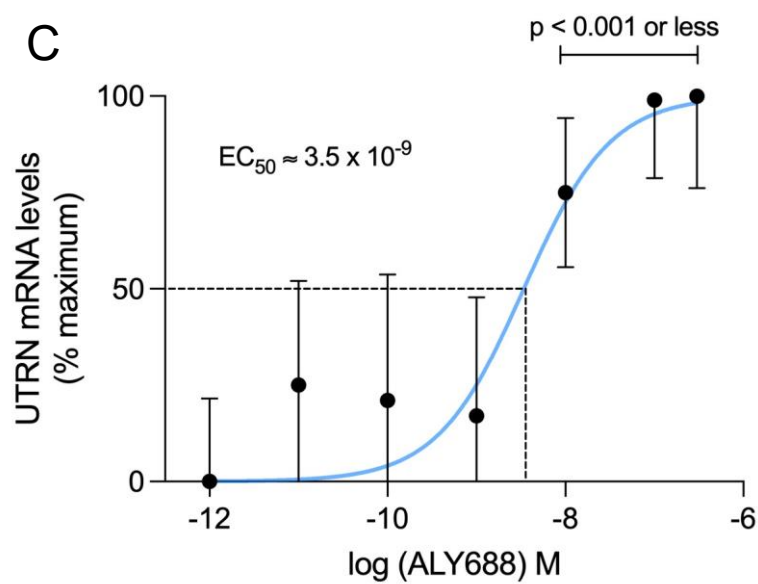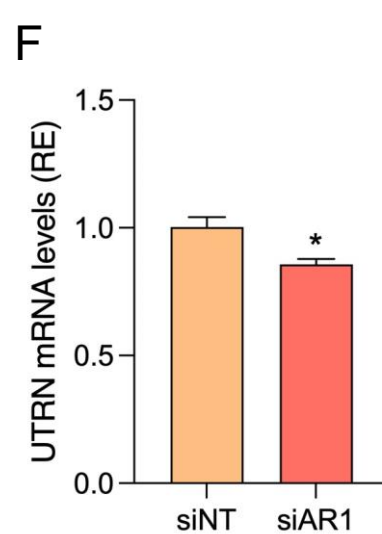

**Figure S4.** *ALY688 recapitulates its anti-inflammatory and pro-UTRN effects in human healthy myotubes, via its action on AdipoR1.* (A-C) Dose-response curves illustrating the effects of ALY688 on *IL-1 $\beta$* , *TNF $\alpha$* , and *UTRN* mRNA levels in primary cultures of myotubes obtained from healthy subjects. Cells were treated or not with several concentrations of ALY688 (from 10 pM to 300 nM) for 24 h, while being challenged with an inflammatory cocktail (human recombinant *TNF $\alpha$* /*INF $\gamma$* , each at 15 ng/mL). mRNA levels were normalised to human *TBP*. Data were then presented as % of the maximal levels obtained either without (A, B) or with 300 nM ALY688 (C). (D-F) In some experiments, cells were first transfected with siRNA against AdipoR1 (50 nM) or a negative control [non-targeting, siNT (50 nM)] for 24h and then treated with ALY688 (100 nM) combined to inflammation (*TNF $\alpha$* /*INF $\gamma$* ) for an additional 24h. After normalisation, mRNA levels were presented as relative expression (RE) to siNT conditions (D-F). Data are means  $\pm$  SEM for 4 cultures, each obtained from a different donor (i.e., 4 healthy subjects). Statistical analysis was performed using repeated measures of ANOVA followed by Dunnett's test (A-C) or two-tailed paired Student's t-test (D-F). \* $P < 0.05$ , \*\* $P < 0.01$ , \*\*\* $P < 0.001$  vs siNT.

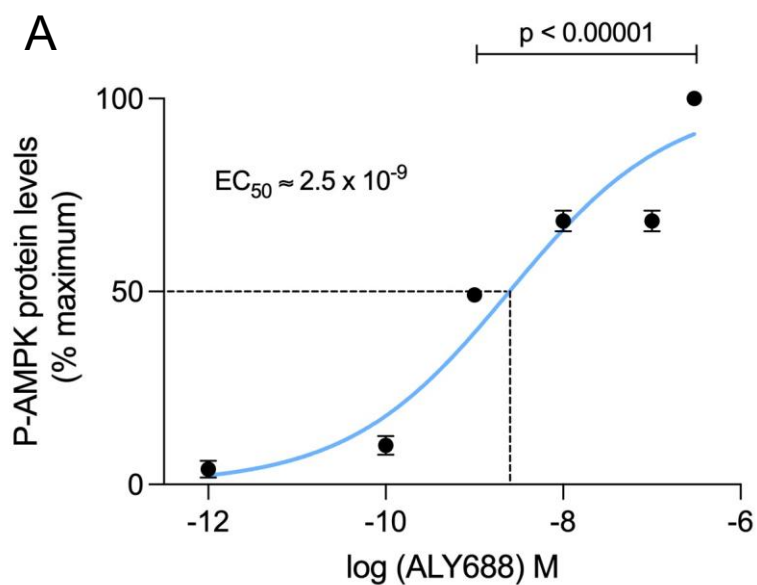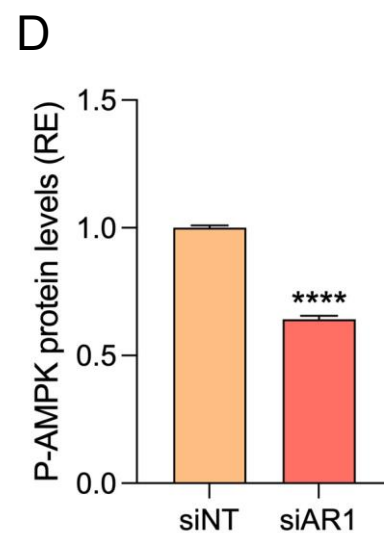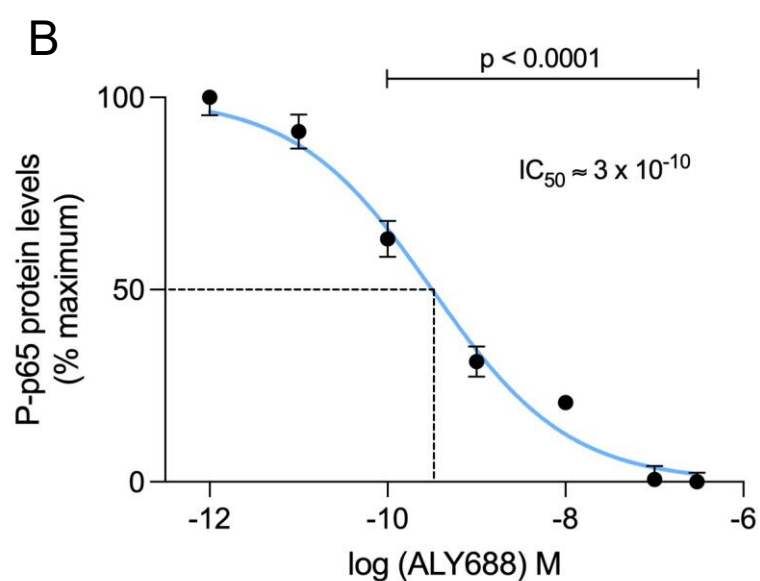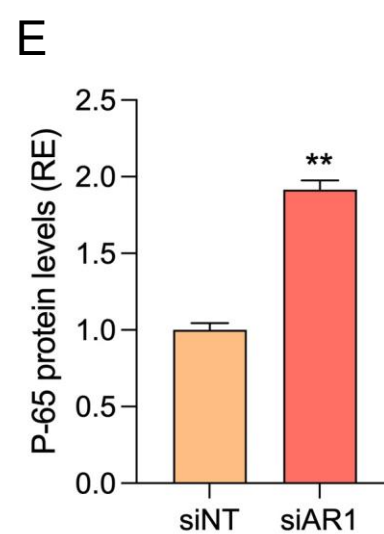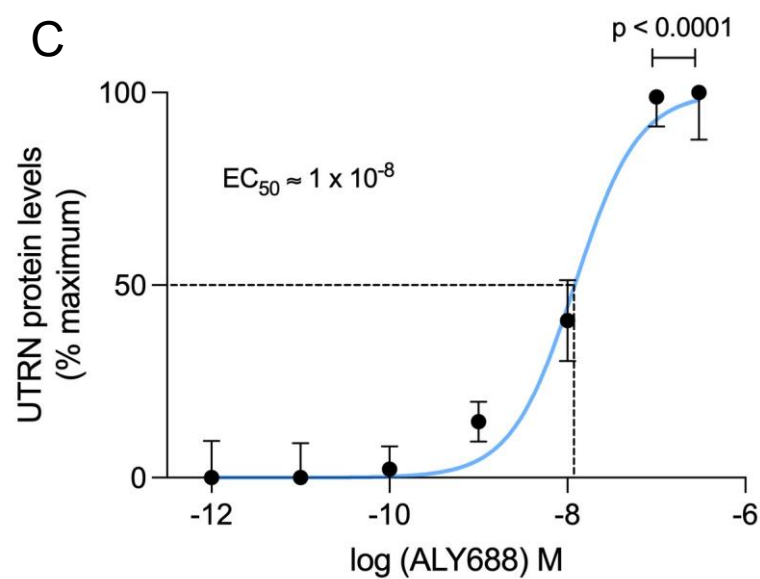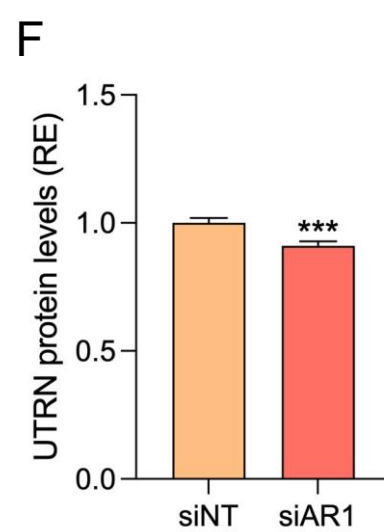

**Figure S5.** *ALY688 treatment recapitulates its effects on key effectors of the AMPK signalling in human healthy myotubes, via its action on AdipoR1. (A-C)* Dose-response curves illustrating the effects of ALY688 on AMPK and NF- $\kappa$ B activity (P-p65 subunit), and UTRN protein levels in primary cultures of myotubes obtained from healthy subjects. Cells were treated or not with several concentrations of ALY688 (from 10 pM to 300 nM) for 24 h, while being challenged with an inflammatory cocktail (human recombinant TNF $\alpha$ /TNF $\gamma$ , each at 15 ng/mL). Levels of each protein were measured by ELISAs and then presented as % of the maximum achieved either without (B) or with 300 nM ALY688 (A, C). **(D-F)** In some experiments, cells were first transfected with siRNA against AdipoR1 (50 nM) or a negative control [non-targeting, siNT (50 nM)] for 24h and then treated with ALY688 (100 nM) combined to inflammation (TNF $\alpha$ /TNF $\gamma$ ) for an additional 24h. For each protein, levels were presented as relative expression (RE) compared with siNT conditions. Data are means  $\pm$  SEM for 4 cultures, each obtained from a different donor (i.e., 4 healthy subjects). Statistical analysis was performed using repeated measures of ANOVA followed by Dunnett's test (A-C) or using two-tailed paired Student's t-test (D-F). \*\* $P < 0.01$ , \*\*\* $P < 0.001$ , \*\*\*\* $P < 0.0001$  vs siNT.
